# Supplementary material
Source: PubMed Central journal article supplement (PMC6990855)

## Supplementary Online Content

Kichenadasse G, Miners JO, Mangoni AA, Rowland A, Hopkins A, Sorich MJ. Association between body mass index and overall survival with immune checkpoint inhibitor therapy for advanced non–small cell lung cancer. *JAMA Oncol*. Published online December 26, 2019. doi:10.1001/jamaoncol.2019.5241

**eTable 1.** Baseline Characteristics of Atezolizumab Treated Patients

**eTable 2.** Cox Proportional Hazards Regression Analysis for Overall Survival/Progression Free Survival for Atezolizumab Treated Patients Across Trials

**eTable 3.** Sex-Specific Association Between BMI and Overall Survival for Patients With Advanced NSCLC Treated With Atezolizumab

**eTable 4.** Cause of Death by Trials

**eTable 5.** Cause of Death by BMI Groups

**eTable 6.** Pooled Adverse Events Related to Atezolizumab Across All Trials

**eTable 7.** Baseline Characteristics of Docetaxel Treated Patients

**eTable 8.** Baseline Characteristics of the Pooled Intention-to-Treat Populations of the OAK and POPLAR Trials Excluding Participants With Missing or Underweight BMI

**eFigure 1.** Forest Plots for Adverse Events From Atezolizumab

**eFigure 2.** OS as per BMI Categories for Pooled OAK and POPLAR Trials

This supplementary material has been provided by the authors to give readers additional information about their work.

**eTable 1.** Baseline Characteristics of Atezolizumab Treated Patients.

|                                | Total<br>No. 1,434 | 18.5 - 24.9<br>No. 705 | 25.0 - 29.9<br>No. 490 | ≥30.0<br>No. 239 | P-value |
|--------------------------------|--------------------|------------------------|------------------------|------------------|---------|
| Study                          |                    |                        |                        |                  | 0.90    |
| BIRCH                          | 611 (43%)          | 301 (43%)              | 214 (44%)              | 96 (40%)         |         |
| FIR                            | 122 (9%)           | 61 (9%)                | 44 (9%)                | 17 (7%)          |         |
| OAK                            | 563 (39%)          | 274 (39%)              | 188 (38%)              | 101 (42%)        |         |
| POPLAR                         | 138 (10%)          | 69 (10%)               | 44 (9%)                | 25 (10%)         |         |
| Age (years)                    | 64 (57 - 70)       | 64 (56 - 70)           | 64 (58 - 71)           | 63 (57 - 70)     | 0.093   |
| Sex                            |                    |                        |                        |                  | < 0.001 |
| Male                           | 890 (62%)          | 388 (55%)              | 344 (70%)              | 158 (66%)        |         |
| Female                         | 544 (38%)          | 317 (45%)              | 146 (30%)              | 81 (34%)         |         |
| Race                           |                    |                        |                        |                  | < 0.001 |
| White                          | 1,132 (79%)        | 519 (74%)              | 407 (83%)              | 206 (86%)        |         |
| Asian                          | 210 (15%)          | 146 (21%)              | 51 (10%)               | 13 (5%)          |         |
| Other                          | 60 (4%)            | 30 (4%)                | 18 (4%)                | 12 (5%)          |         |
| Missing                        | 32 (2%)            | 10 (1%)                | 14 (3%)                | 8 (3%)           |         |
| ECOG PS                        |                    |                        |                        |                  | 0.067   |
| 0                              | 507 (35%)          | 228 (32%)              | 188 (38%)              | 91 (38%)         |         |
| 1                              | 919 (64%)          | 474 (67%)              | 297 (61%)              | 148 (62%)        |         |
| 2                              | 6 (<1%)            | 2 (<1%)                | 4 (1%)                 | 0 (0%)           |         |
| Missing                        | 2 (<1%)            | 1 (<1%)                | 1 (<1%)                | 0 (0%)           |         |
| Histology                      |                    |                        |                        |                  | 0.16    |
| Non-squamous                   | 1,033 (72%)        | 515 (73%)              | 358 (73%)              | 160 (67%)        |         |
| Squamous                       | 401 (28%)          | 190 (27%)              | 132 (27%)              | 79 (33%)         |         |
| Tumor sites                    |                    |                        |                        |                  | 0.13    |
| <3                             | 724 (50%)          | 349 (50%)              | 241 (49%)              | 134 (56%)        |         |
| ≥3                             | 676 (47%)          | 338 (48%)              | 240 (49%)              | 98 (41%)         |         |
| Missing                        | 34 (2%)            | 18 (3%)                | 9 (2%)                 | 7 (3%)           |         |
| Liver tumor site               | 273 (19%)          | 148 (21%)              | 82 (17%)               | 43 (18%)         | 0.17    |
| Bone tumor site                | 406 (28%)          | 220 (31%)              | 126 (26%)              | 60 (25%)         | 0.058   |
| Brain tumor site               | 65 (5%)            | 40 (6%)                | 20 (4%)                | 5 (2%)           | 0.055   |
| Prior treatments <sup>1</sup>  |                    |                        |                        |                  | 0.53    |
| 0                              | 157 (11%)          | 79 (11%)               | 54 (11%)               | 24 (10%)         |         |
| 1                              | 847 (59%)          | 402 (57%)              | 294 (60%)              | 151 (63%)        |         |
| 2                              | 430 (30%)          | 224 (32%)              | 142 (29%)              | 64 (27%)         |         |
| Smoking history                |                    |                        |                        |                  | 0.022   |
| Never                          | 250 (17%)          | 136 (19%)              | 73 (15%)               | 41 (17%)         |         |
| Previous                       | 1,012 (71%)        | 470 (67%)              | 365 (74%)              | 177 (74%)        |         |
| Current                        | 172 (12%)          | 99 (14%)               | 52 (11%)               | 21 (9%)          |         |
| PD-L1 expression               |                    |                        |                        |                  | 0.91    |
| Negative                       | 491 (34%)          | 240 (34%)              | 166 (34%)              | 85 (36%)         |         |
| Positive                       | 938 (65%)          | 462 (66%)              | 322 (66%)              | 154 (64%)        |         |
| Missing                        | 5 (<1%)            | 3 (<1%)                | 2 (<1%)                | 0 (0%)           |         |
| Lactate dehydrogenase          |                    |                        |                        |                  | 0.78    |
| ≤ ULN                          | 843 (59%)          | 412 (58%)              | 284 (58%)              | 147 (62%)        |         |
| > ULN                          | 547 (38%)          | 268 (38%)              | 191 (39%)              | 88 (37%)         |         |
| Missing                        | 44 (3%)            | 25 (4%)                | 15 (3%)                | 4 (2%)           |         |
| Neutrophil to lymphocyte ratio |                    |                        |                        |                  | 0.004   |
| <3                             | 491 (34%)          | 214 (30%)              | 177 (36%)              | 100 (42%)        |         |
| ≥3                             | 863 (60%)          | 450 (64%)              | 283 (58%)              | 130 (54%)        |         |
| Missing                        | 80 (6%)            | 41 (6%)                | 30 (6%)                | 9 (4%)           |         |
| C Reactive Protein (mg/L)      |                    |                        |                        |                  | < 0.001 |
| Median (IQR)                   | 14 (4 - 42)        | 15 (4 - 48)            | 13 (5 - 45)            | 11 (4 - 32)      |         |
| Missing                        | 43 (3%)            | 26 (4%)                | 9 (2%)                 | 8 (3%)           |         |

Data are median (IQR) or number of patients (%). P values per Fisher test for categorical data and Wilcoxon test for continuous data. <sup>1</sup>Number of prior treatments in the locally advanced or metastatic setting

**eTable 2. Cox proportional hazards regression analysis for overall survival/progression free survival for atezolizumab treated patients across trials**

| Variables                  | Overall Survival - HR (95% CI) |                  |                  |                  |                  |
|----------------------------|--------------------------------|------------------|------------------|------------------|------------------|
|                            | All trials                     | BIRCH            | FIR              | OAK              | POPLAR           |
| BMI (Kg/m <sup>2</sup> )   |                                |                  |                  |                  |                  |
| 25.0-29.9                  | 0.80 (0.67-0.96)               | 0.78 (0.56-1.09) | 0.30 (0.09-0.96) | 0.90 (0.69-1.16) | 0.32 (0.16-0.67) |
| ≥ 30                       | 0.69 (0.54-0.87)               | 0.58 (0.35-0.95) | 0.13 (0.01-1.23) | 0.83 (0.60-1.14) | 0.37 (0.18-0.75) |
| Age (years)                | 1.0 (0.99-1.01)                | 1.01 (0.99-1.03) | 0.97 (0.97-1.08) | 1.00 (0.99-1.01) | 1.00 (0.97-1.03) |
| Female sex                 | 1.02 (0.85-1.23)               | 1.17 (0.85-1.60) | 0.68 (0.19-2.47) | 1.02 (0.78-1.33) | 0.77 (0.42-1.42) |
| Race                       |                                |                  |                  |                  |                  |
| Asian                      | 0.81 (0.63-1.04)               | 1.61 (1.00-2.58) | 2.78 (0.74-10.5) | 0.69 (0.50-0.95) | 0.40 (0.16-1.01) |
| Other                      | 1.18 (0.82-1.69)               | 1.48 (0.73-3.00) | 0.24 (0.02-2.66) | 1.07 (0.65-1.78) | 1.07 (0.41-2.27) |
| ECOG PS                    | 1.42 (1.18-1.70)               | 1.50 (1.07-2.10) | 2.08 (0.76-5.69) | 1.38 (1.08-1.76) | 1.30 (0.71-2.40) |
| Squamous histology         | 1.15 (0.96-1.38)               | 1.05 (0.76-1.45) | 1.34 (0.40-4.47) | 1.26 (0.97-1.63) | 0.90 (0.51-1.60) |
| Count of tumor sites       | 1.52 (1.29-1.79)               | 1.24 (0.91-1.69) | 1.14 (0.44-2.95) | 1.73 (1.17-2.18) | 1.03 (0.56-1.90) |
| Number of prior treatments | 1.10 (0.95-1.27)               | 1.09 (0.89-1.34) | 0.76 (0.21-2.79) | 1.06 (0.82-1.36) | 0.74 (0.43-1.28) |
| Smoking history            |                                |                  |                  |                  |                  |

|                                                |                  |                  |                  |                   |                  |
|------------------------------------------------|------------------|------------------|------------------|-------------------|------------------|
| Previous                                       | 0.77 (0.61-0.98) | 0.72 (0.47-1.09) | 0.69 (0.23-2.01) | 0.77 (0.55-1.09)  | 0.97 (0.42-2.24) |
| Current                                        | 0.79 (0.58-1.10) | 0.80 (0.42-1.51) | 0.52 (0.11-2.79) | 0.73 (0.46-1.16)  | 0.82 (0.29-2.82) |
| PD-L1 high                                     | 0.59 (0.47-0.74) | N/A              | NA               | 0.56 (0.43-0.73)  | 0.61 (0.34-1.09) |
| High LDH at baseline                           | 1.39 (1.18-1.64) | 1.57 (1.15-2.13) | 1.42 (0.47-4.26) | 1.36 (1.08-1.70)  | 1.79 (1.02-3.14) |
| Log CRP                                        | 1.42 (1.33-1.52) | 1.59 (1.40-1.80) | 1.43 (1.00-2.05) | 1.34 (1.23-1.47)  | 1.62 (1.30-2.03) |
| Neutrophil Lymphocyte Ratio > 3                | 1.52 (1.25-1.85) | 1.79 (1.19-2.70) | 3.02(0.56-16.3)  | 1.42 (1.10-1.84)  | 1.48 (0.81-2.70) |
| <b>Progression free survival - HR (95% CI)</b> |                  |                  |                  |                   |                  |
| BMI (Kg/m <sup>2</sup> )                       |                  |                  |                  |                   |                  |
| 25.0-29.9                                      | 0.88(0.77-1.02)  | 0.84 (0.67-1.05) | 0.50 (0.19-1.31) | 1.00 (0.81-1.24)  | 0.68 (0.41-1.12) |
| ≥ 30                                           | 0.87 (0.72-1.04) | 0.77 (0.57-1.03) | 0.52 (0.13-2.07) | 1.09 (0.83-1.429) | 0.52 (0.29-0.94) |
| Age (years)                                    | 0.99 (0.99-1.00) | 0.99 (0.98-1.01) | 1.00 (0.97-1.04) | 0.99 (0.98-1.00)  | 1.00 (0.97-1.02) |
| Female sex                                     | 0.99 (0.86-1.14) | 1.01 (0.82-1.26) | 0.93 (0.36-2.36) | 0.94 (0.75-1.17)  | 1.20 (0.75-1.92) |
| Race                                           |                  |                  |                  |                   |                  |
| Asian                                          | 1.12 (0.93-1.35) | 1.34 (0.97-1.84) | 2.89 (0.88-9.44) | 1.02 (0.78-1.31)  | 0.80 (0.43-1.49) |
| Other                                          | 1.15 (0.85-1.57) | 1.72 (0.95-3.15) | 1.55 (0.27-8.83) | 0.94 (0.61-1.46)  | 0.84 (0.40-1.77) |
| EOCG PS                                        | 1.12 (0.98-1.28) | 1.08 (0.87-1.33) | 1.04 (0.48-2.25) | 1.02 (0.84-1.24)  | 1.54 (0.97-2.43) |
| Squamous histology                             | 1.09 (0.95-1.26) | 1.10 (0.88-1.38) | 0.89 (0.34-2.29) | 1.09 (0.87-1.37)  | 1.02 (0.65-1.60) |
| Count of tumor sites                           | 1.20 (1.06-1.37) | 0.98 (0.79-1.21) | 1.07 (0.49-2.34) | 1.41 (1.16-1.71)  | 1.39 (0.82-2.23) |

|                                 |                  |                  |                  |                  |                  |
|---------------------------------|------------------|------------------|------------------|------------------|------------------|
| Number of prior treatments      | 0.97 (0.87-1.08) | 1.00 (0.88-1.15) | 0.76 (0.24-2.37) | 0.87 (0.70-1.08) | 0.84 (0.54-1.32) |
| Smoking history                 |                  |                  |                  |                  |                  |
| Previous                        | 0.69 (0.58-0.83) | 0.65 (0.49-0.87) | 1.21 (0.46-3.15) | 0.64 (0.49-0.85) | 0.77 (0.44-1.38) |
| Current                         | 0.59 (0.46-0.76) | 0.61 (0.40-0.93) | 1.11 (0.28-4.44) | 0.52 (0.35-0.77) | 0.50 (0.23-1.09) |
| PD-L1 high                      | 0.70 (0.58-0.85) | NA               | NA               | 0.68 (0.55-0.84) | 0.70 (0.46-1.08) |
| High LDH at baseline            | 1.33 (1.16-1.51) | 1.46 (1.18-1.80) | 2.21 (0.92-5.30) | 1.28 (1.06-1.55) | 1.05 (0.68-1.63) |
| Log CRP                         | 1.15 (1.09-1.21) | 1.20 (1.11-1.30) | 1.44 (1.06-1.95) | 1.11 (1.03-1.20) | 1.13 (0.95-1.35) |
| Neutrophil Lymphocyte Ratio > 3 | 1.19 (1.03-1.37) | 1.16 (0.92-1.46) | 0.65 (0.19-2.24) | 1.23 (1.00-1.51) | 1.42 (0.90-2.24) |

CI= confidence interval, HR= Hazard ratio, NA = not applicable as only high PDL1 patients included

**eTable 3.** Sex-specific association between BMI and overall survival for patients with advanced NSCLC treated with atezolizumab.

|               | Events/Patients | Median, months<br>(95% CI) | Univariable HR<br>(95% CI) <sup>1</sup> |
|---------------|-----------------|----------------------------|-----------------------------------------|
| <b>Women</b>  |                 |                            |                                         |
| BMI 18.5-24.9 | 155/317         | 13.3 (10.1-16.3)           | 1 (reference)                           |
| BMI 25.0-29.9 | 59/146          | 15.0 (14.1-NR)             | 0.74 (0.55-0.99)                        |
| BMI ≥ 30      | 27/81           | NR                         | 0.57 (0.38-0.86)                        |
| <b>Men</b>    |                 |                            |                                         |
| BMI 18.5-24.9 | 206/388         | 10.0 (8.2-13.5)            | 1 (reference)                           |
| BMI 25.0-29.9 | 165/344         | 13.2 (12.1-16.0)           | 0.80 (0.65-0.98)                        |
| BMI ≥ 30      | 73/158          | 14.9 (11.8-20.7)           | 0.65 (0.50-0.85)                        |

CI=confidence interval, HR=hazard ratio, NR=not reached

<sup>1</sup>stratified for study

**eTable 4:** Cause of death by trials

| Cause              | N (%)                   |                    |                 |                  |                    |
|--------------------|-------------------------|--------------------|-----------------|------------------|--------------------|
|                    | All trials<br>(n = 742) | BIRCH<br>(n = 223) | FIR<br>(n = 60) | OAK<br>(n = 383) | POPLAR<br>(n = 76) |
| Cancer related     | 673 (91%)               | 200 (90%)          | 50 (83%)        | 357 (93%)        | 66 (87%)           |
| Non-cancer related | 69 (9%)                 | 23 (10%)           | 10 (17%)        | 26 (7%)          | 10 (13%)           |

**eTable 5:** Cause of deaths by BMI groups

| Cause of deaths    | BMI groups (Kg/m <sup>2</sup> ) N (%) P = 0.44 |                        |                        |                  |                     |
|--------------------|------------------------------------------------|------------------------|------------------------|------------------|---------------------|
|                    | Total<br>(n = 742)                             | 18-5-24.9<br>(n = 361) | 25.0-29.9<br>(n = 224) | ≥30<br>(n = 100) | Missing<br>(n = 57) |
| Cancer related     | 673 (91%)                                      | 326 (90%)              | 201 (90%)              | 94 (94%)         | 52 (91%)            |
| Non-cancer related | 69 (9%)                                        | 35 (9.7%)              | 23 (10%)               | 6 (6%)           | 5 (8.8%)            |



**eTable 6.** Pooled adverse events related to atezolizumab across all trials

| Adverse events             | BMI groups (Kg/m <sup>2</sup> ) N (%) |                        |                        |                  | P value |
|----------------------------|---------------------------------------|------------------------|------------------------|------------------|---------|
|                            | Total<br>(n = 1411)                   | 18-5-24.9<br>(n = 693) | 25.0-29.9<br>(n = 480) | ≥30<br>(n = 238) |         |
| TRAEs                      | 911 (64%)                             | 450 (65%)              | 307 (64%)              | 154 (65%)        | 0.92    |
| TRAEs<br>(grade 3 or more) | 178 (13%)                             | 83 (12%)               | 67 (14%)               | 28 (12%)         | 0.66    |
| irAEs<br>(all grades)      | 390 (27%)                             | 177 (26%)              | 138 (29%)              | 75 (32%)         | 0.73    |

**eTable 7.** Baseline characteristics of docetaxel treated patients.

|                                       | <b>Total<br/>No. 676</b> | <b>18.5 - 24.9<br/>No. 353</b> | <b>25.0 - 29.9<br/>No. 221</b> | <b>&gt;= 30.0<br/>No. 102</b> | <b>P-value</b> |
|---------------------------------------|--------------------------|--------------------------------|--------------------------------|-------------------------------|----------------|
| <b>Study</b>                          |                          |                                |                                |                               | 0.055          |
| <b>OAK</b>                            | 548 (81%)                | 294 (83%)                      | 180 (81%)                      | 74 (73%)                      |                |
| <b>POPLAR</b>                         | 128 (19%)                | 59 (17%)                       | 41 (19%)                       | 28 (27%)                      |                |
| <b>Age (years)</b>                    | 63 (57 - 69)             | 62 (56 - 70)                   | 65 (58 - 69)                   | 62 (56 - 68)                  | 0.064          |
| <b>Sex</b>                            |                          |                                |                                |                               | 0.53           |
| <b>Male</b>                           | 419 (62%)                | 212 (60%)                      | 143 (65%)                      | 64 (63%)                      |                |
| <b>Female</b>                         | 257 (38%)                | 141 (40%)                      | 78 (35%)                       | 38 (37%)                      |                |
| <b>Race</b>                           |                          |                                |                                |                               | < 0.001        |
| <b>White</b>                          | 497 (74%)                | 234 (66%)                      | 169 (76%)                      | 94 (92%)                      |                |
| <b>Asian</b>                          | 124 (18%)                | 87 (25%)                       | 33 (15%)                       | 4 (4%)                        |                |
| <b>Other</b>                          | 35 (5%)                  | 21 (6%)                        | 11 (5%)                        | 3 (3%)                        |                |
| <b>Missing</b>                        | 20 (3%)                  | 11 (3%)                        | 8 (4%)                         | 1 (1%)                        |                |
| <b>ECOG PS</b>                        |                          |                                |                                |                               | 0.72           |
| <b>0</b>                              | 250 (37%)                | 126 (36%)                      | 84 (38%)                       | 40 (39%)                      |                |
| <b>1</b>                              | 425 (63%)                | 227 (64%)                      | 137 (62%)                      | 61 (60%)                      |                |
| <b>Missing</b>                        | 1 (<1%)                  | 0 (0%)                         | 0 (0%)                         | 1 (1%)                        |                |
| <b>Histology</b>                      |                          |                                |                                |                               | 0.17           |
| <b>Non-squamous</b>                   | 484 (72%)                | 263 (75%)                      | 154 (70%)                      | 67 (66%)                      |                |
| <b>Squamous</b>                       | 192 (28%)                | 90 (25%)                       | 67 (30%)                       | 35 (34%)                      |                |
| <b>Tumor sites</b>                    |                          |                                |                                |                               | 0.015          |
| <b>&lt;3</b>                          | 266 (39%)                | 123 (35%)                      | 92 (42%)                       | 51 (50%)                      |                |
| <b>≥3</b>                             | 410 (61%)                | 230 (65%)                      | 129 (58%)                      | 51 (50%)                      |                |
| <b>Liver tumor site</b>               | 145 (21%)                | 80 (23%)                       | 48 (22%)                       | 17 (17%)                      | 0.45           |
| <b>Bone tumor site</b>                | 207 (31%)                | 112 (32%)                      | 71 (32%)                       | 24 (24%)                      | 0.24           |
| <b>Brain tumor site</b>               | 66 (10%)                 | 42 (12%)                       | 17 (8%)                        | 7 (7%)                        | 0.16           |
| <b>Prior treatments<sup>1</sup></b>   |                          |                                |                                |                               | 0.38           |
| <b>1</b>                              | 499 (74%)                | 258 (73%)                      | 160 (72%)                      | 81 (79%)                      |                |
| <b>2</b>                              | 177 (26%)                | 95 (27%)                       | 61 (28%)                       | 21 (21%)                      |                |
| <b>Smoking history</b>                |                          |                                |                                |                               | 0.12           |
| <b>Never</b>                          | 110 (16%)                | 68 (19%)                       | 30 (14%)                       | 12 (12%)                      |                |
| <b>Previous</b>                       | 457 (68%)                | 225 (64%)                      | 161 (73%)                      | 71 (70%)                      |                |
| <b>Current</b>                        | 109 (16%)                | 60 (17%)                       | 30 (14%)                       | 19 (19%)                      |                |
| <b>PD-L1 expression</b>               |                          |                                |                                |                               | 0.76           |
| <b>Negative</b>                       | 457 (68%)                | 242 (69%)                      | 150 (68%)                      | 65 (64%)                      |                |
| <b>Positive</b>                       | 216 (32%)                | 110 (31%)                      | 71 (32%)                       | 35 (34%)                      |                |
| <b>Missing</b>                        | 3 (<1%)                  | 1 (<1%)                        | 0 (0%)                         | 2 (2%)                        |                |
| <b>Lactate dehydrogenase</b>          |                          |                                |                                |                               | 0.76           |
| <b>≤ ULN</b>                          | 371 (55%)                | 193 (55%)                      | 120 (54%)                      | 58 (57%)                      |                |
| <b>&gt; ULN</b>                       | 287 (42%)                | 152 (43%)                      | 96 (43%)                       | 39 (38%)                      |                |
| <b>Missing</b>                        | 18 (3%)                  | 8 (2%)                         | 5 (2%)                         | 5 (5%)                        |                |
| <b>Neutrophil to lymphocyte ratio</b> |                          |                                |                                |                               | 0.97           |
| <b>&lt;3</b>                          | 247 (37%)                | 128 (36%)                      | 82 (37%)                       | 37 (36%)                      |                |
| <b>≥3</b>                             | 418 (62%)                | 219 (62%)                      | 139 (63%)                      | 60 (59%)                      |                |
| <b>Missing</b>                        | 11 (2%)                  | 6 (2%)                         | 0 (0%)                         | 5 (5%)                        |                |
| <b>C Reactive Protein (mg/L)</b>      |                          |                                |                                |                               | 0.55           |
| <b>Median (IQR)</b>                   | 13 (4 - 38)              | 14 (4 - 39)                    | 11 (4 - 36)                    | 13 (5 - 31)                   |                |
| <b>Missing</b>                        | 7 (1%)                   | 3 (1%)                         | 2 (1%)                         | 2 (2%)                        |                |

Data are median (IQR) or number of patients (%). P values per Fisher test for categorical data and Wilcoxon test for continuous data.

<sup>1</sup>Number of prior treatments in the locally advanced or metastatic setting

**eTable 8.** Baseline characteristics of the pooled intention-to-treat populations of the OAK and POPLAR trials excluding participants with missing or underweight BMI.

|                                       | <b>Total No. 1,419</b> | <b>Docetaxel No. 712</b> | <b>Atezolizumab No. 707</b> |
|---------------------------------------|------------------------|--------------------------|-----------------------------|
| <b>Study</b>                          |                        |                          |                             |
| <b>OAK</b>                            | 1,144 (81%)            | 577 (81%)                | 567 (80%)                   |
| <b>POPLAR</b>                         | 275 (19%)              | 135 (19%)                | 140 (20%)                   |
| <b>Age (years)</b>                    | 63 (56 - 69)           | 63 (57 - 69)             | 63 (56 - 69)                |
| <b>Sex</b>                            |                        |                          |                             |
| <b>Male</b>                           | 886 (62%)              | 438 (62%)                | 448 (63%)                   |
| <b>Female</b>                         | 533 (38%)              | 274 (38%)                | 259 (37%)                   |
| <b>Race</b>                           |                        |                          |                             |
| <b>White</b>                          | 1,036 (73%)            | 522 (73%)                | 514 (73%)                   |
| <b>Asian</b>                          | 263 (19%)              | 130 (18%)                | 133 (19%)                   |
| <b>Other</b>                          | 73 (5%)                | 38 (5%)                  | 35 (5%)                     |
| <b>Missing</b>                        | 47 (3%)                | 22 (3%)                  | 25 (4%)                     |
| <b>ECOG PS</b>                        |                        |                          |                             |
| <b>0</b>                              | 524 (37%)              | 267 (38%)                | 257 (36%)                   |
| <b>1</b>                              | 893 (63%)              | 444 (62%)                | 449 (64%)                   |
| <b>Missing</b>                        | 2 (<1%)                | 1 (<1%)                  | 1 (<1%)                     |
| <b>Histology</b>                      |                        |                          |                             |
| <b>Non-squamous</b>                   | 1,027 (72%)            | 514 (72%)                | 513 (73%)                   |
| <b>Squamous</b>                       | 392 (28%)              | 198 (28%)                | 194 (27%)                   |
| <b>Tumor sites</b>                    |                        |                          |                             |
| <b>&lt;3</b>                          | 594 (42%)              | 282 (40%)                | 312 (44%)                   |
| <b>≥3</b>                             | 825 (58%)              | 430 (60%)                | 395 (56%)                   |
| <b>Liver tumor site</b>               | 299 (21%)              | 151 (21%)                | 148 (21%)                   |
| <b>Bone tumor site</b>                | 430 (30%)              | 218 (31%)                | 212 (30%)                   |
| <b>Brain tumor site</b>               | 126 (9%)               | 72 (10%)                 | 54 (8%)                     |
| <b>Prior treatments<sup>1</sup></b>   |                        |                          |                             |
| <b>1</b>                              | 1,041 (73%)            | 529 (74%)                | 512 (72%)                   |
| <b>2</b>                              | 378 (27%)              | 183 (26%)                | 195 (28%)                   |
| <b>Smoking history</b>                |                        |                          |                             |
| <b>Never</b>                          | 251 (18%)              | 122 (17%)                | 129 (18%)                   |
| <b>Previous</b>                       | 959 (68%)              | 476 (67%)                | 483 (68%)                   |
| <b>Current</b>                        | 209 (16%)              | 114 (16%)                | 95 (13%)                    |
| <b>BMI (Kg/m<sup>2</sup>)</b>         |                        |                          |                             |
| <b>18.5-24.9</b>                      | 720 (51%)              | 377 (53%)                | 343 (49%)                   |
| <b>25.0-29.9</b>                      | 467 (33%)              | 229 (32%)                | 238 (34%)                   |
| <b>≥ 30</b>                           | 232 (16%)              | 106 (15%)                | 126 (18%)                   |
| <b>PD-L1 expression</b>               |                        |                          |                             |
| <b>Negative</b>                       | 978 (69%)              | 483 (68%)                | 495 (70%)                   |
| <b>Positive</b>                       | 432 (30%)              | 225 (32%)                | 207 (29%)                   |
| <b>Missing</b>                        | 9 (1%)                 | 4(1%)                    | 5 (1%)                      |
| <b>Lactate dehydrogenase</b>          |                        |                          |                             |
| <b>≤ ULN</b>                          | 777(55%)               | 372 (55%)                | 405 (57%)                   |
| <b>&gt; ULN</b>                       | 560 (39%)              | 287 (40%)                | 273 (39%)                   |
| <b>Missing</b>                        | 82 (6%)                | 53 (7%)                  | 29 (4%)                     |
| <b>Neutrophil to lymphocyte ratio</b> |                        |                          |                             |
| <b>&lt;3</b>                          | 515 (37%)              | 247 (35%)                | 268 (38%)                   |
| <b>≥3</b>                             | 837 (59%)              | 419 (59%)                | 418 (59%)                   |
| <b>Missing</b>                        | 67 (5%)                | 46 (6%)                  | 21 (3%)                     |
| <b>C Reactive Protein (mg/L)</b>      |                        |                          |                             |
| <b>Median (IQR)</b>                   | 14 (4 - 41)            | 13 (4 - 38)              | 15 (5 - 43)                 |
| <b>Missing</b>                        | 58 (4%)                | 42 (6%)                  | 16 (2%)                     |

Data are median (IQR) or number of patients (%).

<sup>1</sup>Number of prior treatments in the locally advanced or metastatic setting

**eFigure 1:** Forest plots for adverse events from atezolizumab

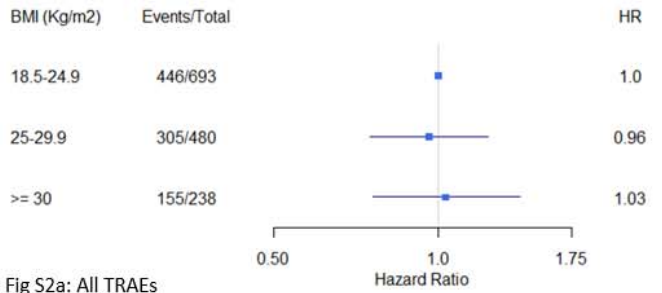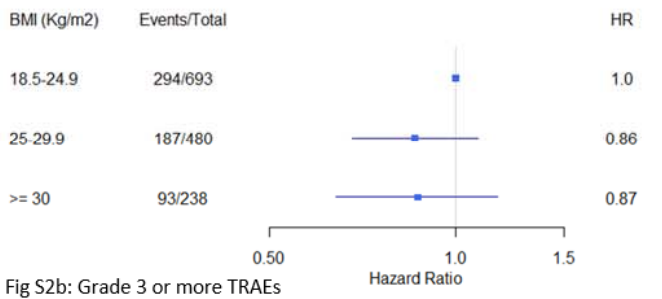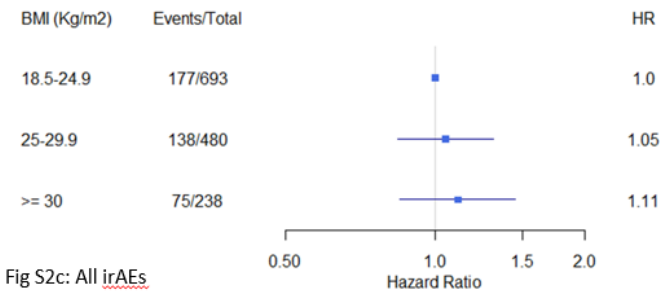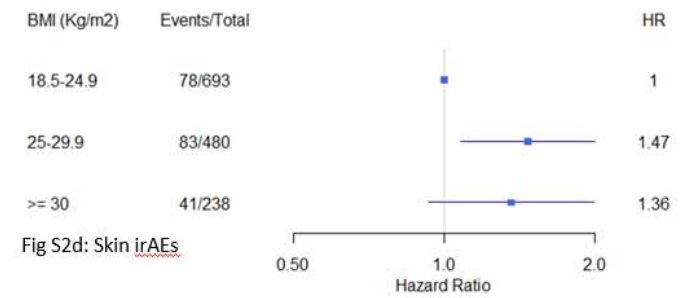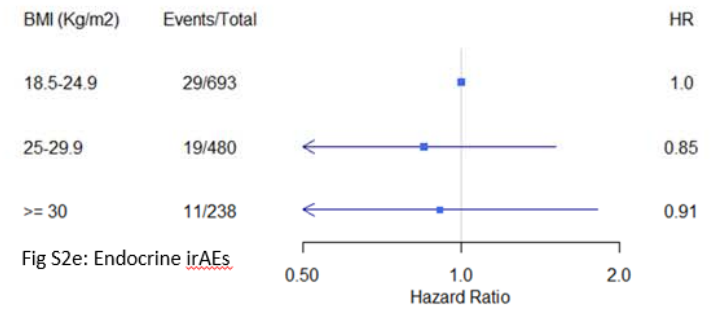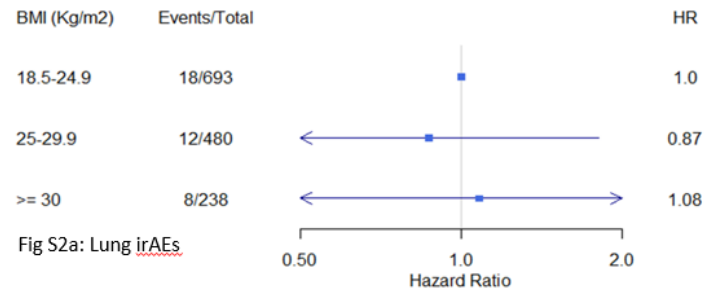

**eFigure 2: OS as per BMI categories for pooled OAK and POPLAR trials**

A) BMI  $\geq 30$  kg/m<sup>2</sup>

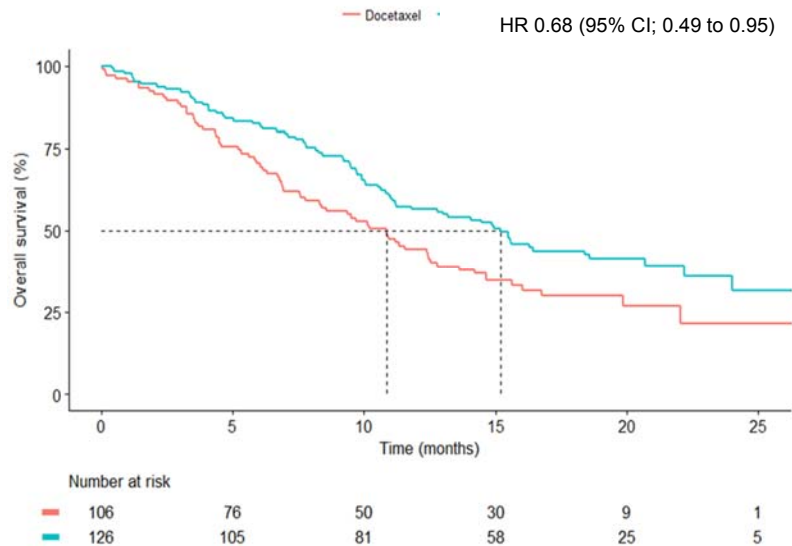

B) BMI 25-29.9 kg/m<sup>2</sup>

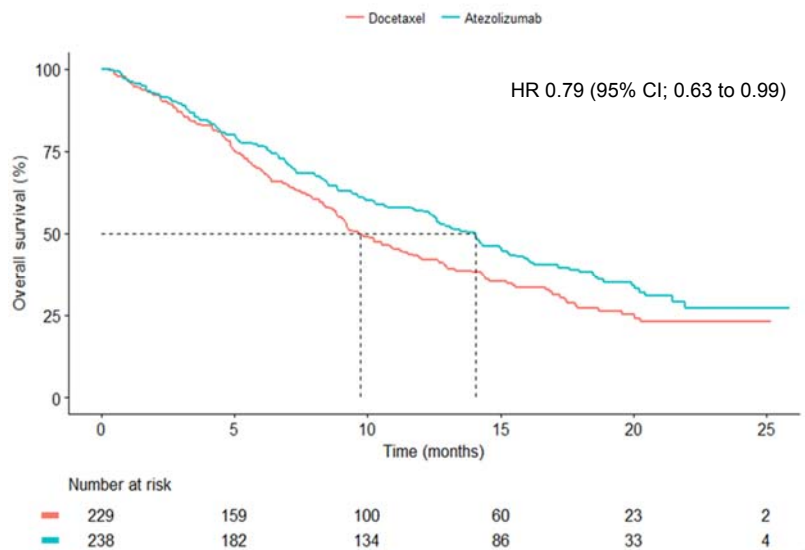

C) BMI 18.5-24.9 kg/m<sup>2</sup>

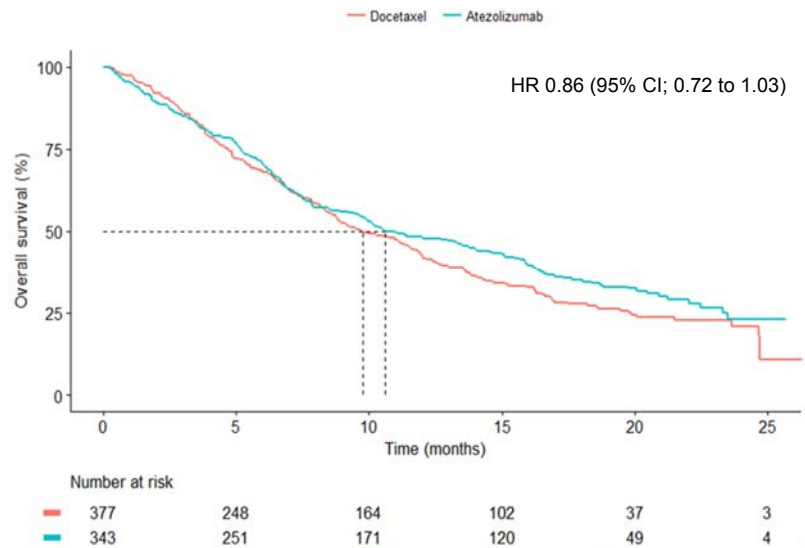

Supplement: jamaoncol-e195241-s001.pdf [file jamaoncol-e195241-s001.pdf]
